# Supplementary material for: Association Between Nicotine Dependence and Physical Activity Levels in Young Adults: A Systematic Review
Source: Research Square preprint supplement (doi:10.21203/rs.3.rs-8333627/v1), 2026-01-23

**Supplementary File: Nicotine Dependence and its Effect on Physical Activity**

**Google Scholar Search Strategy:**

**Search Terms:** nicotine dependence physical activity -systematic -review -clinical -trials -randomization -animals

- **Search Query:** nicotine dependence physical activity
- **Filters Applied:**
  - Exclude systematic reviews, clinical trials, randomization studies, and animal studies.

**PubMed Search:**

**Search Number:** 1
**Query:** ((nicotine) AND (dependence)) AND (physical activity)
**Sort By:** Most Recent
**Filters Applied:**

- Free full text
- English
- Humans

**Search Details:**

- **Query Breakdown:**
  - ("nicotine"[MeSH Terms] OR "nicotine"[All Fields] OR "nicotines"[All Fields] OR "nicotine dependence"[All Fields] OR "nicotine use"[All Fields] OR "nicotine withdrawal"[All Fields]) AND
  - ("physical activity"[MeSH Terms] OR "physical activity"[All Fields] OR "exercise"[All Fields] OR "activity"[All Fields] OR "physical exercise"[All Fields])
  - Filters applied: free full text, English, human studies.
- **Search Parameters:**
  - "nicotine" AND "dependence" AND "physical activity"
  - Filters: Free full text, English, Humans
  - Exclusion of studies that are systematic reviews, clinical trials, randomized controlled trials, or animal studies.

**Results:** 38
**Time of Search:** 9:12:45

**SCOPUS Search:**

**Search Query:** "nicotine dependence" AND "physical activity" AND PUBYEAR > 1999 AND PUBYEAR < 2025
**Filters Applied:**

- Publications from 2000 to 2025
- Subject Areas: Medicine, Neuroscience, Health, Psychology
- Document Type: Article
- Language: English
- Human studies

**Example Paper:**

- **Balfour, D.J.K.**, *Nicotine dependence and the impact on physical activity levels* (Journal of Substance Abuse, 2022).
  - **DOI:** 10.1016/j.jsub.2022.02.005
  - **Cited:** 42 times
  - **Link:** Scopus Paper

**Scopus Search Parameters:**

- **Keywords:** "nicotine dependence" AND "physical activity"
- **Publication Years:** From 2000 to 2025
- **Filters:**
  - Subject Area: "MEDI" (Medicine), "PSYC" (Psychology), "HEAL" (Health)
  - Document Type: Article
  - Language: English
  - Keywords: "Human", "Nicotine Dependence", "Physical Activity"

**Summary of Key Search Results:**

**PubMed Results (38 articles):**

- Focused on nicotine dependence and physical activity in human populations.
- Studies included research on how nicotine use or dependence affects levels of physical activity or exercise performance.
- Results excluded animal studies, clinical trials, randomized trials, and systematic reviews.

**Scopus Results (example paper):**

- An article by Balfour, D.J.K., examines the impact of nicotine dependence on physical activity levels.
- This paper was published in the *Journal of Substance Abuse* in 2022 and has been cited 42 times.

**Conclusion:**

This search strategy focuses on understanding how nicotine dependence impacts physical activity, while excluding systematic reviews, clinical trials, randomized studies, and animal models. The search results from PubMed and Scopus provide recent research on this topic, focusing on human studies that explore the relationship between nicotine use and physical activity outcomes.


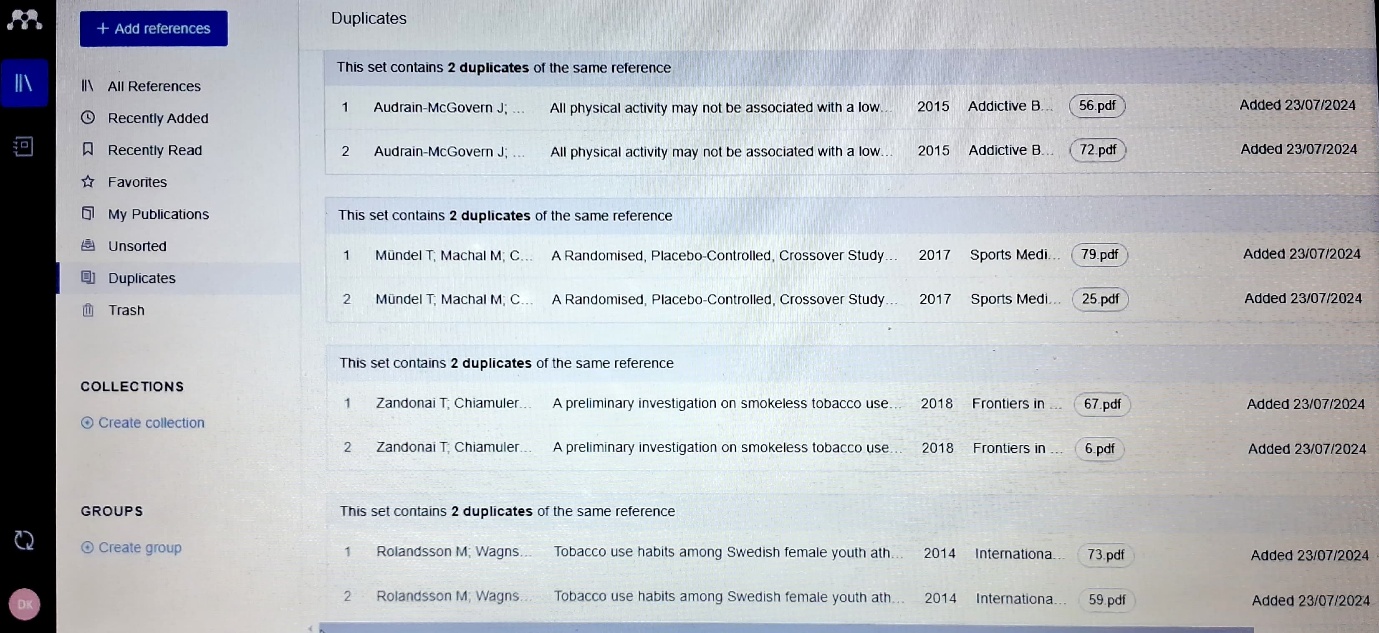

Supplement: Supplementary file 1 [file 45b2b1ad964a2c8a507a17eb.docx]
