# Supplementary material for: Association Between Nicotine Dependence and Physical Activity Levels in Young Adults: A Systematic Review
Source: Research Square preprint supplement (doi:10.21203/rs.3.rs-8333627/v1), 2026-01-23
Supplement: Supplementary file 2 [file ee48a4b9e1104362c637c0d6.docx]

| **AUTHOR / YEAR** | **TITLE** | **STUDY DESIGN** | **STUDY DURATION** | **SAMPLE SIZE** | **DEMOGRAPHY** | **OUTCOME MEASURE** | **STATISTICS** | **RESULT** | **CONCLUSION** |
| --- | --- | --- | --- | --- | --- | --- | --- | --- | --- |
| Vanessa Seet E et al 2021 | Physical activity, sedentary behaviour and  smoking status among psychiatric patients  in Singapore – a cross-sectional study | Cross sectional study | One year | 380 | Over the course of a year, participants were actively sought out from Singapore's Institute of Mental Health.  The study team engaged with potential participants in the outpatient clinic and received clinician referrals to identify eligible candidates. Recruitment focused on individuals who met the following criteria: they were between 21 and 65 years of age. This approach aimed to ensure a diverse and representative sample for the study. | This study confidently aims to identify the key factors associated with Singaporean mental health patients' levels of physical exercise and sedentary lifestyle. Additionally, it will explore how physical activity patterns vary based on smoking status, providing valuable insights into the needs of this population. | Cross-tabulations and chi-square  tests were applied | It has been discovered that attaining the prescribed amounts of physical exercise is highly correlated with education. On the other hand, excessive sedentary behaviour was significantly correlated with age and marital status. Additionally, there were significant rates of the study population exhibited overly sedentary actions (38.8%) and insufficient physical exercise (43.2%), despite the fact that There were no discernible differences between current, ex-, and not smoking  with regard to the various levels of physical activity involvement. | Due to the widespread issue of insufficient physical activity and excessive sedentary behavior among current and former smokers, as well as non-smokers with psychiatric disorders, it is essential to incorporate programs that promote increased physical activity and reduce sedentary behavior into targeted treatment plans. This integration could lead to improved clinical outcomes. |
| **Tümer Ulus et al 2012** | **Prevalence of Smoking and Related Risk Factors among Physical Education and Sports School Students at Istanbul University** | Cross sectional study | 2 months | 373 | Male respondents made up 166 (44.5%) and female respondents made up 207 (55.5%) of the 373 participants. With an average age of commencement of smoking of 18.03 years and a standard deviation of 2.6 years (range: 12 to 30 years), 94 (25.2%) of these students were currently smokers. | Examining smoking frequency and attitudes among students was the goal of this study at Istanbul University’s Physical Education and Sports School. | The chi-square test was used to analyze significant associations among a number of variables, such as sex, age, the kind of high school completed, residence, and the mother's and father's educational backgrounds.  It also examined cigarette or tobacco use in the living environment, students' knowledge of their teachers' smoking habits, and alcohol consumption. All statistical analyses were conducted at a 95% confidence level, with a significance threshold set at p ≤ 0.05. | In this study, we identified several factors that contribute to smoking prevalence. These factors include age, place of residence, and the educational backgrounds of both parents. Moreover, we found that tobacco use within the household, students' awareness of their teachers' smoking habits, and their alcohol consumption practices are also important influences. Understanding these associations can help inform targeted interventions to reduce smoking rates in the community (p ≤ 0.05). | Students enrolled in physical education and sports programs are aware of the detrimental effects of smoking on health. Nevertheless, our study revealed that more than 25% of these students are smokers. Given that great majority students was not received formal instruction on the dangers in smoking, this is very troubling.  . Therefore, it advocate for the incorporation of health education programs focused on the risks of smoking into the academic curriculum. Such programs would serve to enhance students' understanding of this issue and contribute to the reduction of smoking prevalence within this demographic. |
| Kenneth A. et al 2005 | The discriminative stimulus, subjective,  cardiovascular, and reinforcing effects of nicotine as  a function of light physical activity | Cross sectional interventional study | 6 months | 17 | The study involved 17 young, healthy smokers, consisting of seven men and ten women, who were recruited from the university community in the area and paid for their involvement. The following are the topics' attributes: 21.5 years old was the average age (M¡SE = 0.5), with a daily smoking rate of 15.9 cigarettes (M¡SE = 1.1), and an average smoking history of 5.9 years (M¡SE = 0.7). The participants had an average score according to Heatherton, Kozlowski, Frecker, and Fagerstrom (1991), 3.8 in the test of Fagerstrom for dependency in nicotine  (M¡SE = 0.6), indicating their level of nicotine dependence. | Goal is to evaluate the impact of nicotine on various factors, including its discriminative stimulus properties, subjective sensations, cardiovascular responses, and reinforcing characteristics, during two different levels of light physical activity. These effects were compared to those experienced during periods of quiet rest among individuals who smoke cigarettes. Notably, we have not come across any research that has specifically assessed how engaging in physical activity simultaneously impacts any drug's discriminative or reinforcing stimuli effects in both human and animal models.This study aims to fill that gap in knowledge and contribute to a better understanding of the interplay between nicotine and physical activity. | Analysis of nicotine-appropriate responding during generalization testing was conducted using a two-choice procedure. A variance analysis The within-subject factors in the ANOVA were the generalisation dosages of nicotine spray (0, 3, 6, 12, 20 mg/kg) and the degree of physical activity (rest, very light, and light). | The carbon monoxide (CO) values (M ± SE) recorded upon arrival prior to each session exhibited no significant differences between the conditions, ranging between 5.9 ± 0.7 and to 6.6 ± 0.7, which verifies recent cessation of smoking  . Furthermore, final result indicated that there was no changes statistically across activity conditions with respect to plasma nicotine levels obtained after generalization of discrimination testing. The recorded plasma nicotine levels were 56.4 ± 0.6 ng/ml for rest, 7.2 ± 0.4 ng/ml for very light activity,also 6.5 ± 0.6 ng/ml was seen in light activities. The F - statistic reached F(2, 30) = 1.09, indicating there is none changes seen(p more than 0.05). | Effects in nicotine on discriminative stimuli, subjective experiences, cardiovascular responses, and reinforcement are similar during both light physical activity and quiet rest. This suggests that laboratory findings on acute nicotine responses may also apply to natural smoking conditions. Further research is necessary to explore whether these results extend to tobacco smoking and other responses not examined in the study. |
| Ladislav et al 2015 | **The acute effect of nicotine intake on anaerobic exercise performance** | Cross sectional study | 7 weeks | 18 | A well-designed crossover study was conducted with 18 healthy young individuals, 7 women , 11 males. Women were 23.6 ± 1.6 years old on average, while men were 22.7 ± 2.9 years old on average.. To ensure solid and trustworthy results, participants in this study were randomised to receive either a placebo or sublingual tablets containing nicotine (4 mg).  . | The following crucial elements of optimal short-term anaerobic performance are assessed by the Wingate anaerobic test:   The maximum power output attained during the test is shown by the symbol **Maximum Anaerobic Power**. **Anaerobic Capacity**: This is the cumulative work or average power output during the course of the test.   **Power Drop**: Usually assessed at the conclusion of the test, this is the power drop from the maximum output to the lowest output that was observed. A relative proportion of the maximum power output is used to express it. | Descriptive statistics | Table 1 displays the results of the Wingate anaerobic tests that were conducted both before and after nicotine (N1-2) or a placebo (C1-2). The findings show that after taking the placebo tablet (C2), all measured parameters increased, especially peak power (Pmax) and cadence (Vmax). According to the second tests' power drop (PD) results (N2, C2), nicotine appears to have no influence on weariness.  Furthermore, there was no statistically significant decline in performance observed in the placebo group between the first (N1, C1) and second tests (N2, C2). | The mechanical performance of sublingual pills containing 4 mg of nicotine and those containing a placebo did not differ significantly, according to the study. These findings might point to some of nicotine's predicted positive effects on short-term maximal power. |
| Toby Mündel 2017 | A Randomised, Placebo-Controlled,  Crossover Study Investigating the Effects of  Nicotine Gum on Strength, Power and  Anaerobic Performance in Nicotine-Naïve,  Active Males | Experimental trial | 2 years | 9 | For the study, 9 healthy guys who had never smoked were chosen (mean ± SD: height, 179 ± 13 cm; body mass index, 78 ± 15 kg; age, 24 ± 3 yrs). Everybody involved is an athlete. | The current study makes the hypothesis in which nicotine stimulates central nervous system, will enhance performance at lower doses but not at higher doses when compared to a placebo. This enhancement will be measured in terms of leg extensor torque, muscular power, and anaerobic performance. | Descriptive values are confidently presented as mean,standard deviations. We conductedtest of Levene to confirm in which data adhered closely to a normal distribution. The baseline or resting data for physiological variables were thoroughly analyzed using a one-way ANOVA. | Participants reported no negative effects from nicotine, and the presence of cotinine, its primary metabolite, confirmed the presence of nicotine. Isometric and eccentric torque significantly influenced both the peak torque and average peak torque (NIC-2 was greater than PLA; p value is less than 0.05), while the average peak did not differ significantly (p more than 0.05).  Concentric torque varied from trial to trial. The height of each counter to movement juming seems to be same between trial (p more than 0.05). Although the anaerobic level of the Wingate test was constant between trials (p more than 0.05), the strategy of placing(particularly power of peak, exhaustion rate) varied between NIC-2 and PLA.  Nicotine affected pH levels (NIC-2 was greater than PLA; p < 0.05), and in every trial, pH decreased following the Wingate test. | The 4 mg nicotine gum had very little effect on the evaluated performance metrics. On the other hand, 20 minutes prior to exercise, ingesting 2 mg of nicotine gum considerably increased leg extensor torque. However, when compared to a placebo, it had no effect on Wingate performance or counter-movement jump height. |
| George et al 2012 | **Smoking and Physical Activity Interrelations in**  **Health Science Students. Is Smoking Associated**  **with Physical Inactivity in Young Adults?** | Cohort study | One year | 1651 | The participants were randomly selected from an population of students in health science enrolled in Medical School of Athens University, Medical School Ioannina University, and Physical Therapy departments at the Technological Educational Institutes (TEIs) of Athens, Lamia, and Patras. | The primary objectives is examining smoking behaviour,physical exercise status among students of Greek health science, as well as to investigate potential associations between smoking and physical activity within this sample of young adults. | The study utilized analysis of variance (ANOVA) to assess differences in anthropometric indices between groups. For non-parametric continuous data, such as physical activity scores (PAscores), the Mann-Whitney U test was employed, while categorical data, including physical activity classifications (PAclass), were analyzed using the chi-square test. This methodological approach allowed for a comprehensive examination of differences based on sex and smoking status, comparing non-smokers with current smokers. | In conclusion frequency in smoking is found as 37.6 percentage. Among these smokers, 23.1% were identified as heavy smokers, defined as individuals who smoke 21 or more cigarettes per day. While The general prevalence of smoking among males and females was not different  , high smoking seen most frequently among guys, indicating a gender disparity in smoking habits.  Additionally, the age at which individuals began smoking showed a negative correlation with the daily number of cigarettes they consumed, a relationship that was particularly evident in females. This suggests that females who started smoking at a younger age tended to smoke fewer cigarettes each day compared to those who started at an older age.  In terms of physical activity, only 14.2% of the participants in the study were classified as engaging in health-enhancing physical activity, which falls under the high physical activity (PA) class. Conversely, a significant portion of the population, 45.4%, was categorized as insufficiently active, placing them in the low physical activity class. This lack of physical activity highlights a concern for public health. Furthermore, it was observed that males were generally more physically active than females, suggesting another area of disparity in health-related behaviors within the population. | Smoking frequency and rates of physical inactivity are notably more among students in Greek health science. There is a strong inverse relationship between smoking and physical activity in this group of young adults. |
| Gholamreza et al 2015 | **Smoking and Physical Activity in Healthy Adults: A Cross-Sectional Study in Tehran** | Cross sectional study | - | 2600 | To gain a comprehensive understanding of each participant's socioeconomic status and anthropometric measures, trained physicians conducted evaluations using a structured questionnaire. Participants were classified into categories based on their responses regarding occupation, education, and family size, providing valuable insights into their socioeconomic conditions. Additionally, heights and weights were accurately measured using standardized equipment and procedures, ensuring reliable data collection for further analysis. | Aim is to determine the association between smoking as well as physical action levels, two significant risk factors for non-communicable illnesses, in healthy adults in Tehran, Iran, between the ages of 30 and 60. | The relationship between demographic characteristics and smoking was thoroughly analyzed using the Chi-square test. We confidently employed Student’s t-test to identify significant differences in weight, height, and BMI between smokers and non-smokers. Additionally, we utilized logistic regression to assess the impact of smoking on the appropriateness of physical activity, with clear presentation of the odds ratios (OR) and their corresponding 95% confidence intervals. To ensure the accuracy of our findings, we conducted a robust multiple logistic regression analysis to control for potential confounding factors. | The only demographic factors that were correlated with smoking status was ages (P less than 0.001), attainment education (P less than 0.001). Compared to non-smoking individual, smoking individual had odd’s ratio 4.88 (of which 95% was CI and 3.34to7.13) in inadequate physical activity. | Finally, in a representative sample of the Tehran population, our study sheds light on the significant negative and independent association between cigarette smoking and physical activity. Additionally, we found a strong correlation between smoking and a number of demographic traits.   We must prioritise efforts to address the smoking epidemic with a coordinated and deliberate approach, given the substantial associations between smoking and a number of recognised risk factors for illness and mortality. |
| Dieter Leyk et al 2012 | **Physical Fitness, Weight, Smoking,**  **and Exercise Patterns in Young Adults** | Cross sectional study | - | 8048 | We assessed data from subjects aged 10 to 25 years (N = 8,048), including 2,053 individuals aged 10 to 17 and 5,995 individuals aged 18 to 25. All participants were surveyed and underwent anthropometric examinations, having finished least of one test on motor performance. Participants in the survey included trainees ( of 9.4percent) in commercial, technology , services region as well as general education school students (23.8%) | In this study, young adults with different health risk factors were compared in terms of physical fitness. Based on three distinct risk factors—being overweight, smoking, and not exercising—participants were split up into four groups. These categories included people with all three risk factors as well as those without any risk factors. The number of chin-ups performed (strength) and the time it took to run 1,000 meters (endurance) were used to gauge physical fitness. | Differences in means were assessed using analysis of variance, taking into account the primary factors of sex, age, and the number of risk factors. Dichotomous variables were analyzed employing test of chi-square with or without regressionin binary logistic, with the risk agent designated as the outcome variable. For the regressionin binary logistic and odd’s ratio, their corresponding 95 percent confidence intervals were provided. | Among individuals aged 18 to 25, 28.4% of men and 35.4% of women had none of the identified risk agents then demonstrated best performance physically. As number of risk agents increased, physical performance declined.24, 25 age placed in similar limit of those aged between 14 ,15. | Current study's findings show that, despite a brief exposure period, even if one risk factor is present—   Significant declines in fitness are to be anticipated. These losses are further increased by each new risk factor.  It is impossible to stop unhealthy lifestyles from becoming more ingrained and spreading if comprehensive and successful interventions are not implemented in businesses and schools. |
| Esra Dugral et al 2019 | Effects of smoking and physical exercise on  respiratory function test results in students  of university  A cross-sectional study | Cross sectional study | 2 year | 1014 | Participants who were unwilling to participate, those under the age of 18, and those with airway blockage (FEV 1) were not allowed in participate.   second/forced vital capacity [FEV 1/FVC] < 80%), as well as people who have had abdominal or chest surgery in the past, are experiencing chest discomfort right now, or have had a heart attack or stroke in the past. Subjects' pulmonary symptoms, smoking status, and involvement in sports were noted (Appendix), along with their age, gender, height, and weight. We noted the quantity in smoking cigarette each day (which can be < 1/2 pack,1/2 to 1, or > 1 pack), the present status of passively smoking individual or any history of smoking passively all through childhood age, wheezing over the last 12 months, current sputum output, and current cough. | An investigation into the relationship between smoking and physical activity and PF might reveal that smoking has detrimental effects on physical   Activity has a favorable impact on PF. Here, we looked at how young adults' PF was affected by smoking and exercise. | We used the Pearson chi-squared test to compare the two groups. We used the independent t test when comparing more than two groups. We did   parameters that predict average and above-average PFT status using multivariate regression analysis. P-values less than.05 were regarded as statistically significant. | **After adjusting for height, age, and gender, the spirometric percentile data were utilized as markers of health status (poor <25, average: 25–90, good: >90). Regular exercise was linked to PF in males (good: 7.8, average: 6.5, poor: 14.2, P=.02). Males in the "good" group smoked at a greater rate (in which 31.3, and average of 30, poor of 17.9, Pvalue=.02, females ratio good ratio 22.4,and average ratio  17.9 , P value =.02, poor ratio of 10.4.** Multivariate regression findings showed that above the average PF score test in males were associated with age (in 1.32 [of 1.04to 1.69seen ]) , least of 1 weekly workout (of which 4.06 [from 1.16 to 14.20 seen ]).  **Age (1.85 [1.44–2.37]), irregular exercise (2.88 [1.36–6.09]),exercise untill palpitations increased(of which0.18 [from 0.04 to 0.88]) are all linked to above to the average results in females.** | We looked at young, healthy people who had smoked for an average of three years. Smokers are referred to be "healthy smokers" since it enhances lung function in infancy. Engaging in physical activity did   not impact smokers' lung function, but the lack of exercise markedly deteriorated lung function. |
| **Dr. Anna M. et al 2009** | **Influence of Movie Smoking Exposure and Team Sports**  **Participation on Established Smoking** | Longitudinal study | - | 2048 | The telephone follow-up survey was carried out in the duration of September month 1999 to November month 1999,February month 2006 , February month 2007 in which an mean (SD) as 6.7 (0.2) years following the baseline survey. Trained interviewers conducted it using a   telephone interviewing system with computer assistance. We secured verbal parental agreement and respondent assent for respondents under the age of eighteen prior to administering the telephone survey. All other responders gave their verbal consent. | Our study's goal was to investigate how early exposure to smoking in movies and team sports affected established smoking. Our initial hypothesis was that, in line with earlier studies, team sport players would be less prone than nonparticipants to   to start smoking regularly. Then, we postulated that team sports players would be less likely than non-players to be exposed to early movie smoking because they would have conflicting demands on their attention. | Every covariate that was substantially linked to documented smoking was taken into account. Trend tests were performed on every multivariate analysis. 95% confidence intervals for odds ratios (ORs) respectively   (CIs) are documented. Version of SAS 9.1 (from the Institute of SAS, in North Carolina) , version of stata 10.0 (StataCorp Lp, Station college, in Texas) statistical tools were helpful in analyzing the data. | 353 respondents (17.2%) had a history of smoking at the time of follow-up. Team sports and established smoking were more likely to occur in those exposed to the highest quartile of movie smokers than the lowest (odds ratio=1.63; 95% CI, 1.03–2.57).   The odds of being an established smoker were twice as high for nonparticipants as for participants (odds ratio = 2.01; 95% CI 1.47–2.74). | Participating in team sports is clearly protective against established smoking, even when exposed to smoking in films. However, both team sports players and non-players mostly develop habit of smoking which is an result in being exposed for smoking at films.   Promoting team sports participation while lowering early exposure to movie smoking may be the best way to avoid youth smoking, as parents, teachers, coaches, and medical experts should be aware. |
| **Peter Bartík et al 2023** | **The Effect of High Nicotine Dose on Maximum Anaerobic**  **Performance and Perceived Pain in Healthy Non-Smoking**  **Athletes: Crossover Pilot Study** | Cross over pilot study | - | 15 | The study participants were young, healthy, nonsmoking men in good physical condition, aged 30.7 _ 3, with a BMI of 25.3 _ 4.5, who had never developed a smoking habit. All of the participants were male non-professional athletes who were enlisted at the   Department of Sport and Physical Education, | This study sought to determine how a high-nicotine dose (8 mg) taken orally affected healthy, skilled adult athletes' maximum anaerobic performance and other specific physical performance metrics. | IBM SPSS statistical software, version 25.0, was used to conduct the statistical analysis. A descriptive study in the common features by the benefit action of mean , standard deviation was part in statistical analysis. The gathered data was analyzed using the Kolmogorov–   Shapiro-Wilk and Smirnov tests are used to determine the normality of the distribution. The data were not normally distributed, according to the results (p < 0.05 for both tests). After that, a 0.05 level of significance was used to the Wilcoxon signed-rank test using median values. | The findings showed that giving an 8 mg dosage of nicotine orally had no discernible effect on any of the physical performance metrics that were tracked. Only the statistically significant beneficial effect in RPE (p = 0.03) was reported by us. | The reduction in pain perception that we saw after an 8 mg nicotine dose was administered could be a major factor affecting performance. The physical performance metrics, however, did not show any improvement. |
| **Zaina Chaabane et al 2016** | **Tobacco Use and Its Health Effects among**  **Professional Athletes in Qatar** | Cross sectional study | One month | 108 | **For personal reasons, four athletes from various teams declined to take part, and one player left the test early because they were   uneasy during spirometry examinations. The study and the final data analysis involved 108 athletes in total (weight = 91.5 ⁎ 16.4 kg, height = 190.6 ⁎ 11.9 cm, age = 26.4 ⁎ 5.1 years).** | The aim is to assess the incidence of tobacco smoking in Qatari professional athletes and ascertain how it affected certain physiological and health parameters.   factors, like lung function. | The 95% confidence intervals for the prevalence of smoking cigarettes and shisha were calculated. The independent t-test was employed to find   variations in blood pressure, rate of heart, and function of lung metrics between tobacco users and nonusers, as well as between daily or infrequent cigarette smokers and nonsmokers. | The percentage of athletes who smoked was 27.7%. Compared to nonsmokers, smokers had significantly lower FVC, FVC%, and FEV1% (𝑝 = 0.003, 0.044, and 0.001, resp.). BP, HR, FEV1, FEV1/FVC, PEF, and PEF% did not significantly differ between cigarette smokers and nonsmokers.   Likewise, the FEV1% values of shisha smokers were lower than those of non-shisha smokers (𝑝 = 0.001). | indicators of lung health. Indeed, alterations in lung function could be identified using less sensitive lung function metrics, such as FVC and FEV1, which primarily   represent how big airways work. Athletes are not immune to these health hazards because the literature shows that smokers have lower FEV1 and FVC than nonsmokers. This implies that engaging in frequent, vigorous exercise will not act as resistant to protect the lungs from smoking . |
| **Fang-Ying Su et al 2020** | **Association of Tobacco Smoking with Physical Fitness of Military**  **Males in Taiwan: The CHIEF Study** | Cross sectional study | - | 3669 | 4,080 military soldiers in Eastern Taiwan, ages 18 to 50, were included in the current study and had the yearly health assessment in the Hualien-   They engaged in least of one test out of three exercise at Armed Forces General Hospital and the Military Physical Training and Testing Centre in 2014 that are necessary for military rank advances or prizes. | Our main discovery was that, sizable in military of young cohort Asian , in the age of middle individuals, active tobacco use was linked to decreased aerobic and anaerobic fitness.   men. Given that this was the first study to look into the connection between Asian boys' exercise habits and their tobacco use, | The analysis of each workout performance 0e difference between current and noncurrent smokers was calculated utilizing   covariance (ANCOVA), and mean ± standard error (SE) was used to express the findings. To ascertain the connection between current smoking and both anaerobic and aerobic fitness, multiple linear regression analyses were employed. Multiple logistic regressions were also helpful to access odd’s ratio in high 10 percent ,poorest percentage of performances in every exercises with smoking currently status against noncurrent status of smoking. | Association was found using multiple linear analysis that controlled for body mass index, heart rate, alcohol use, age, service specialty, and training frequency. Current smoking was negatively connected with less repeated 2-meter runs and a more duration in an 3000 of meter run (in which β �15.66 seen, 95percent of CIof ratio 10.62 and 20.70 ) than noncurrent smoking.   − 1.53 (95% CI: − 2.08, − 0.97), and − 1.31 (95% CI: − 2.12, − 0.50) for one minute of sit-ups and two minutes of push-ups, respectively | In summary, our research addressed the idea that active smoking may lower Asian guys in their youth and middle age in terms of both aerobic and anaerobic fitness.   Okay. Therefore, in order to develop fit and healthy armed forces, it is crucial to carefully enforce the smoking cessation policy in the military. |

**Table 1 : analysis of data**
